# Supplementary material for: Reciprocal recurrent selection based on genetic complementation: An efficient way to build heterosis in diploids due to directional dominance
Source: bioRxiv or medRxiv preprint supplement (doi:10.1101/2022.07.05.498857), 2022-07-05

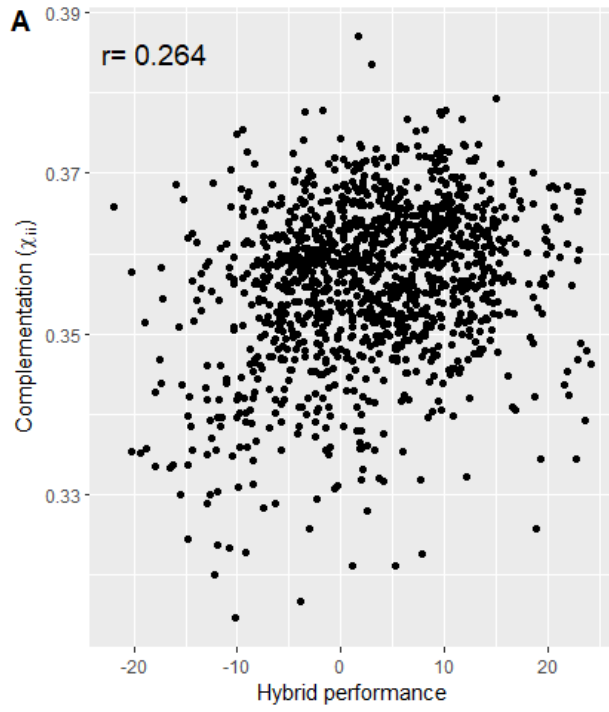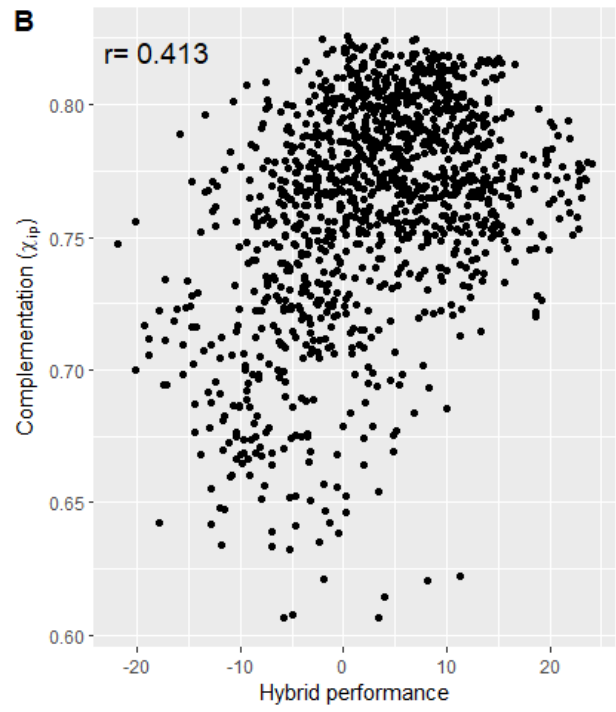

Supplement: Supplementary file [file media-1.pdf]
