# Supplementary material for: Reciprocal recurrent selection based on genetic complementation: An efficient way to build heterosis in diploids due to directional dominance
Source: bioRxiv or medRxiv preprint supplement (doi:10.1101/2022.07.05.498857), 2022-07-05

**A**

Scenario

- NEGATIVE\_CONTROL
- TWO\_POOL\_COMP
- TWO\_POOL\_GCA\_PHENO
- TWO\_POOL\_BV
- TWO\_POOL\_COMP\_TO\_GCA
- TWO\_POOL\_GCA\_TRUE

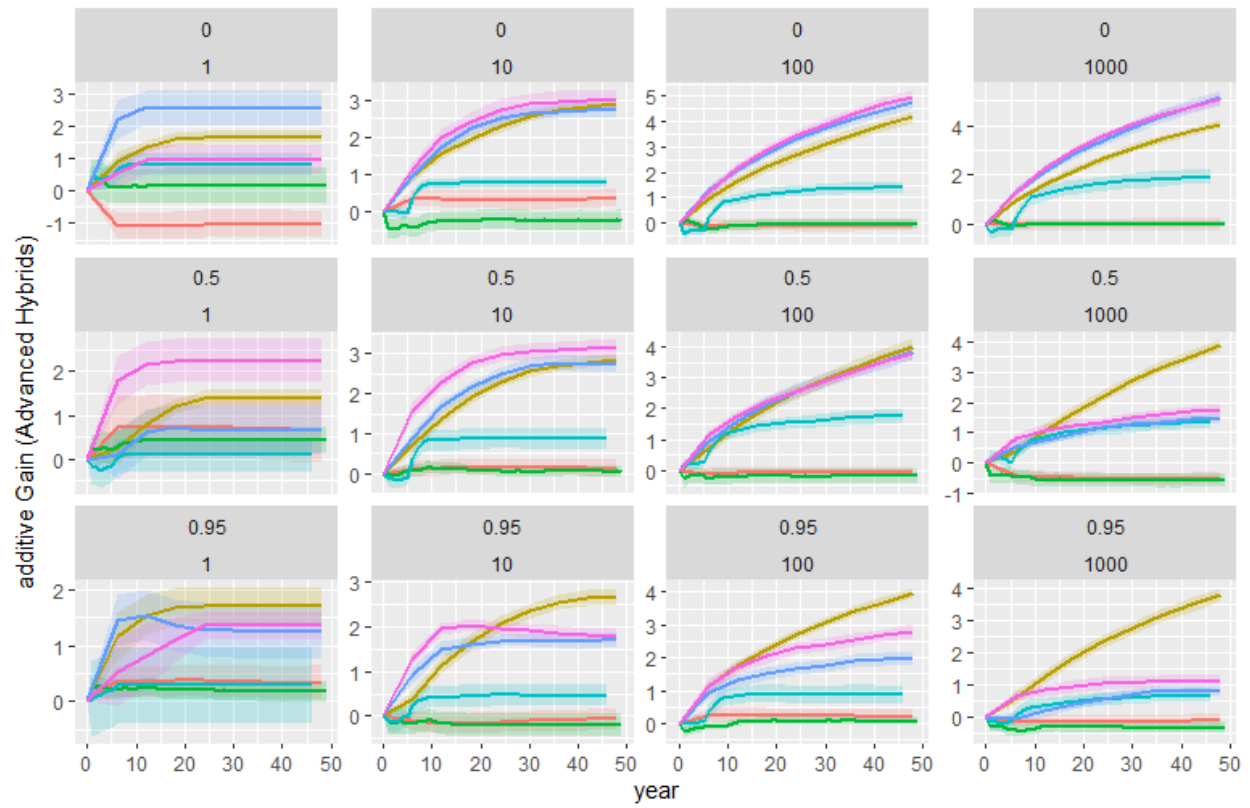**B**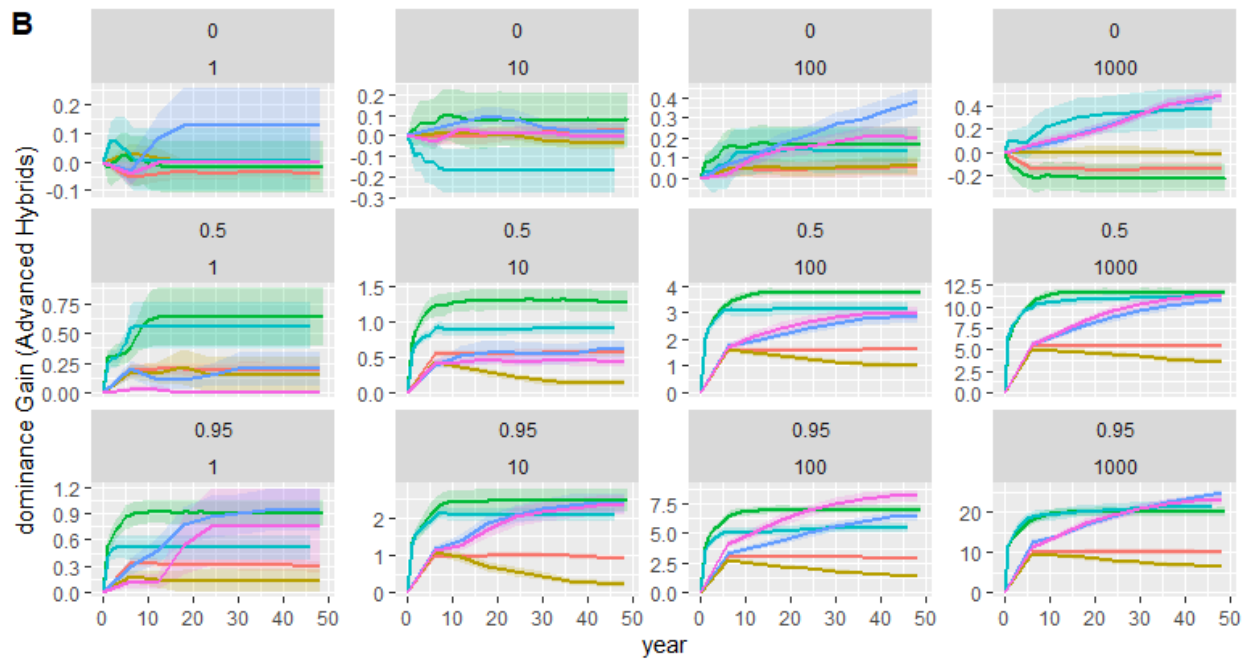

Supplement: Supplementary file [file media-2.pdf]
